# Supplementary material
Source: publisher figshare collection journal article supplement (https://acs.figshare.com/ndownloader/files/6432915)
Supplement: Supplementary file 1 [file 6432915]

## Supplemental Material

### Tetrapeptide endomorphin analogs require both full length and truncated splice variants of the mu opioid receptor gene *Oprm1* for analgesia

Gina F. Marrone, Zhigang Lu, Grace Rossi, Ankita Narayan, Amanda Hunkele, Sarah Marx, Jin Xu, John Pintar, Susruta Majumdar, Ying-Xian Pan, Gavril W. Pasternak

### Supplemental Table 1: Summary of knockout models and endomorphin analog analgesia

| Expression            | Knockout model  |                  |                     |                     |
|-----------------------|-----------------|------------------|---------------------|---------------------|
|                       | E1 <sup>a</sup> | E11 <sup>b</sup> | E1/E11 <sup>c</sup> | Triple <sup>d</sup> |
| <b>MOR-1 Variants</b> |                 |                  |                     |                     |
| 7TM                   | Lost            | Retained         | Lost                | Lost                |
| 6TM                   | Retained        | Lost             | Lost                | Retained            |
| 1TM                   | Lost            | Retained         | Lost                | Lost                |
| <b>DOR-1</b>          | Retained        | Retained         | Retained            | Lost                |
| <b>KOR-1</b>          | Retained        | Retained         | Retained            | Lost                |
| <b>Analgesia</b>      |                 |                  |                     |                     |
| Morphine              | No              | Yes              | No                  | No                  |
| DAMGO                 | No              | Yes              | No                  |                     |
| IBNtxA                | Yes             | No               | No                  | Yes                 |
| DAPP                  |                 | No               | No                  |                     |
| IDAPP                 |                 | No               | No                  |                     |
| Endomorphin 1         | No              | No               | No                  |                     |
| Endomorphin 2         | No              | No               | No                  |                     |
| <b>6TM rescue</b>     |                 |                  |                     |                     |
| IBNtxA                |                 | Yes              | Yes                 |                     |
| DAMGO                 |                 |                  | No                  |                     |
| DAPP                  |                 | Yes              | No                  |                     |
| IDAPP                 |                 | Yes              | No                  |                     |

<sup>a</sup> (1); <sup>b</sup> (2); <sup>c</sup> (3); <sup>d</sup> (4)

Knockout models of *Oprm1* have been described targeting exon 1 (E1), exon 11 (E11), both exon 1 and exon 11 (E1/E11) that selectively eliminate selected classes of splice variants, as indicated. Analgesia is affected differently for various compounds in these models. Morphine and IBNtxA are from the literature (1, 2, 5). The peptides are summarized from this report.

**Supplemental Table 2: Oligodeoxynucleotide antisense targeting sequences**

| Target      | Antisense Sequence        | Mismatch Control Sequence                                                |
|-------------|---------------------------|--------------------------------------------------------------------------|
| <b>E1</b>   | CGCCCCAGCCTCTTCCTCT       | CGCCCCGACCTCTTCCCTT                                                      |
| <b>E1/2</b> | CATTTTGGTATATCTTACAATCAC  | <b>A)</b> TTGATTCTAATTGCTTACAATCAC<br><b>B)</b> CATTTTGGTATATATCCTTACAAC |
| <b>E11</b>  | GACAGTCACTGGTGCCTATGCAATG | GACGATCACGTGTGCTCATGACATG                                                |

Antisense (AS) and mismatch (MIS) oligodeoxynucleotides were designed based upon the published sequence of the mouse mu opioid receptor gene, *Oprm1*. Mismatch for the E1 probe switched the order of two sets of two bases, maintaining a common base composition. Mismatch for the E11 probe switched the order of four sets of two bases, maintaining a common base composition. E1/2 AS was designed to target the splice site between exons 1 and 2, with half the probe annealing to exon 1 and the other to exon 2. Annealing to only exon 1 or 2 would not be of sufficient  $T_m$  to be active. Two mismatch probes were designed for the E1/2 AS. One probe (A) scrambled the 5' end, which targeted exon 1, while the other MS (B) scrambled the 3' end, which targeted exon 2. They were designed to anneal to only exon 2 (A) or exon 1 (B).

**Supplemental Table 3: Summary of Antisense mapping on analgesia**

|                       | Antisense |               |           |
|-----------------------|-----------|---------------|-----------|
|                       | E1        | E1/2 junction | E11       |
| <b>MOR-1 Variants</b> |           |               |           |
| 7TM                   | Lowered   | Lowered       | Unchanged |
| 6TM                   | Unchanged | Unchanged     | Lowered   |
| 1TM                   | Lowered   | Unchanged     | Unchanged |
| <b>Analgesia</b>      |           |               |           |
| Morphine              | Lowered   | Lowered       | Unchanged |
| DAMGO                 | Lowered   | Lowered       | Unchanged |
| IDAPP                 | Lowered   | Lowered       | Lowered   |

Antisense mapping is able to selectively downregulate selected sets of splice variants of the *Oprm1* receptor by targeting individual exons within the gene (6-10). The E1/2 junction antisense targets the junction between exon 1 and 2, which is unique to the 7TM receptors and selectively downregulates them (10). The analgesia results for morphine are from the literature and the peptides are summarized from this report.

## Supplemental Figure 1: Reverse phase HPLC purification of $^{125}\text{I}$ -IDAPP

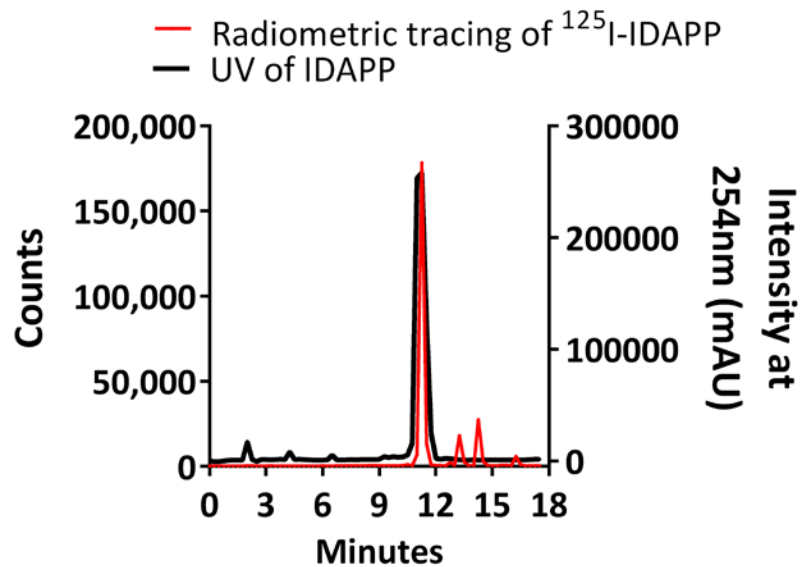

$^{125}\text{I}$ -IDAPP was purified following iodination by HPLC as described in Methods. Comparisons of the radiometric tracing following radioiodination of  $^{125}\text{I}$ -IDAPP (red) and the UV tracing of IDAPP run as a standard (black) indicates that the major radioactive product isolated during the radioiodination has the same retention time as the cold peptide.

## Supplemental Figure 2: $^{125}\text{I}$ -IDAPP binding parameters

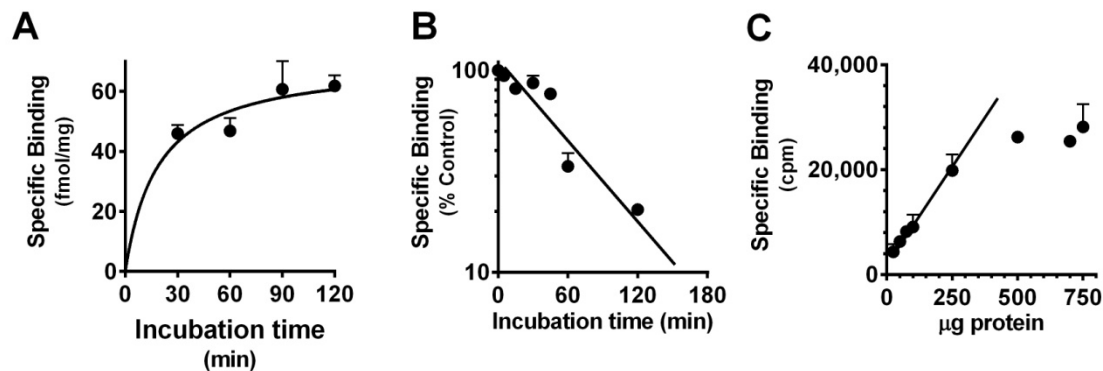

$^{125}\text{I}$ -IDAPP binding (0.1 nM) was carried out in mouse brain and specific binding (the difference between total and 8  $\mu\text{M}$  levallorphan) shown **(a)** Association of  $^{125}\text{I}$ -IDAPP. The radioligand quickly reaches a saturated binding level, plateauing after 90 min. Association data was fit with a one site saturation curve (GraphPad Prism). **(b)** Dissociation of  $^{125}\text{I}$ -IDAPP. The radioligand was incubated with mouse brain tissue for 90 minutes (time 0) at which time levallorphan (8  $\mu\text{M}$ ) was added. Linear regression of the log(binding) vs time yields a  $t_{1/2}$  of 56 min. **(c)** Tissue linearity of  $^{125}\text{I}$ -IDAPP. Tissue was incubated for 90 minutes. Binding was linear with tissue concentrations up to 250  $\mu\text{g}$ .

Supplemental Figure 3:  $^{125}$ I-IDAPP binding assay with different conditions

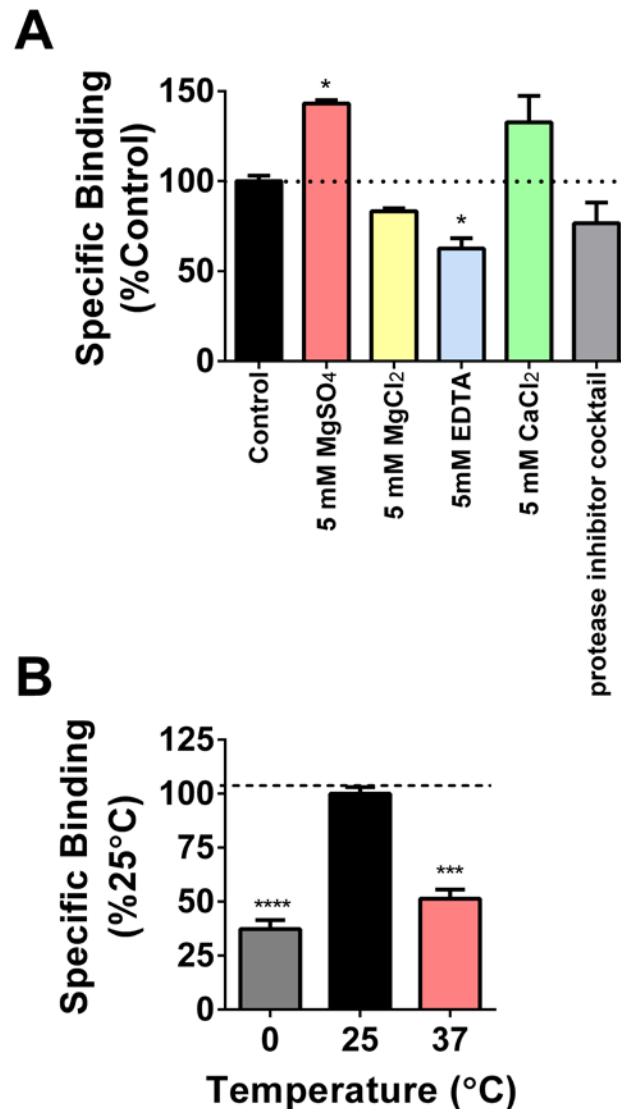

Binding was performed at 0.1 nM in mouse brain. **(a)** Different conditions were examined to determine their influence on specific binding. A one-way ANOVA ( $F_{5,12}=15.64$ ,  $p<0.0001$ ) with Bonferroni's post hoc analysis indicated that magnesium sulfate significantly increased binding whereas EDTA significantly decreased binding,  $*p<0.05$ . **(b)** Binding following incubation at different temperatures. A one-way ANOVA ( $F_{2,6}=73.88$ ,  $p<0.0001$ ) with Bonferroni's post hoc analysis indicated binding at 25 degrees differed from the other temperatures. \*\*\* $p<0.001$ , \*\*\*\* $p<0.0001$

**Supplemental Figure 4: Statistical analysis of  $^{35}\text{S}$ -GTPyS stimulation in brain**

|       | <b>F<sub>(2,6)</sub></b> | <b>P Value</b> | <b>Bonferroni post hoc analysis</b> |                      |                     |
|-------|--------------------------|----------------|-------------------------------------|----------------------|---------------------|
|       |                          |                | <b>WT vs E11</b>                    | <b>E11 vs E1/E11</b> | <b>WT vs E1/E11</b> |
| DAMGO | 13.2                     | 0.006          | 0.999                               | 0.009                | 0.021               |
| IDAPP | 28.4                     | 0.0009         | 0.047                               | 0.015                | 0.0009              |
| EM1   | 106.3                    | 0.0001         | 0.006                               | 0.0001               | 0.0003              |
| DM2   | 150.5                    | 0.0001         | 0.005                               | 0.0001               | 0.0001              |
|       |                          |                |                                     |                      |                     |

Anova with Bonferroni posthoc analysis of  $^{35}\text{S}$ -GTPyS stimulation from Table 4.

## References

1. Schuller, A. G., King, M. A., Zhang, J., Bolan, E., Pan, Y. X., Morgan, D. J., Chang, A., Czick, M. E., Unterwald, E. M., Pasternak, G. W., and Pintar, J. E. (1999) Retention of heroin and morphine-6 beta-glucuronide analgesia in a new line of mice lacking exon 1 of MOR-1, *Nat.Neurosci.* 2, 151-156.
2. Pan, Y. X., Xu, J., Xu, M., Rossi, G. C., Matulonis, J. E., and Pasternak, G. W. (2009) Involvement of exon 11-associated variants of the mu opioid receptor MOR-1 in heroin, but not morphine, actions, *Proc.Natl.Acad.Sci.U.S.A* 106, 4917-4922.
3. Lu, Z., Xu, J., Rossi, G. C., Majumdar, S., Pasternak, G. W., and Pan, Y. X. (2015) Mediation of opioid analgesia by a truncated 6-transmembrane GPCR, *J Clin Invest* 125, 2626-2630.
4. Cox, V., Clarke, S., Czyzyk, T., Ansonoff, M., Nitsche, J., Hsu, M. S., Borsodi, A., Tomboly, C., Toth, G., Hill, R., Pintar, J., and Kitchen, I. (2005) Autoradiography in opioid triple knockout mice reveals opioid and opioid receptor like binding of naloxone benzoylhydrazone, *Neuropharmacology* 48, 228-235.
5. Majumdar, S., Grinnell, S., Le, R., V, Burgman, M., Polikar, L., Ansonoff, M., Pintar, J., Pan, Y. X., and Pasternak, G. W. (2011) Truncated G protein-coupled mu opioid receptor MOR-1 splice variants are targets for highly potent opioid analgesics lacking side effects, *Proc.Natl.Acad.Sci.U.S.A* 108, 19776-19783.
6. Rossi, G. C., Pan, Y.-X., Brown, G. P., and Pasternak, G. W. (1995) Antisense mapping the MOR-1 opioid receptor: Evidence for alternative splicing and a novel morphine-6 $\beta$ -glucuronide receptor, *FEBS Lett.* 369, 192-196.
7. Rossi, G. C., Pan, Y.-X., Cheng, J., and Pasternak, G. W. (1994) Blockade of morphine analgesia by an antisense oligodeoxynucleotide against the mu receptor, *Life Sci.* 54, L375-L379.
8. Rossi, G. C., Standifer, K. M., and Pasternak, G. W. (1995) Differential blockade of morphine and morphine-6 $\beta$ -glucuronide analgesia by antisense oligodeoxynucleotides directed against MOR-1 and G-protein  $\alpha$  subunits in rats, *Neurosci.Lett.* 198, 99-102.
9. Marrone, G. F., Grinnell, S. G., Lu, Z., Rossi, G. C., Le Rouzic, V., Xu, J., Majumdar, S., Pan, Y. X., and Pasternak, G. W. (2016) Truncated mu opioid GPCR variant involvement in opioid-dependent and opioid-independent pain modulatory systems within the CNS, *Proc Natl Acad Sci U S A* 113, 3663-3668.
10. Xu, J., Xu, M., Brown, T., Rossi, G. C., Hurd, Y. L., Inturrisi, C. E., Pasternak, G. W., and Pan, Y. X. (2013) Stabilization of the mu opioid receptor by truncated single transmembrane splice variants through a chaperone-like action, *J.Bio.Chem.* 288, 21211-21227.
